# Supplementary material for: Dihydroisoxazole inhibitors of Anopheles gambiae seminal transglutaminase AgTG3
Source: PubMed Central journal article supplement (PMC4113009; doi:10.1186/1475-2875-13-210), 2014-06-02
Supplement: 1475-2875-13-210-S2.pdf [file 1475-2875-13-210-S2.pdf]

## Supplementary Table 1. TG Inhibitor Library Structures

The library consisted of 92 transglutaminase inhibitors, comprising the following chemotypes:

- 83 dihydroisoxazole (DHI) inhibitors (labeled DXX)
- 8 acylidene oxoindoles (labeled IXX)
- 1 thienopyrimidinones (labeled MXX)

The DHI inhibitors were based on the 3-halo-4,5-dihydroisoxazole motive that covalently and irreversibly inactivates the active site of transglutaminases.[1-7] The acylidene oxoindoles appear as reversible, slow tight binding inhibitors of TG2; their (allosteric) binding site is unknown.[8] The thienopyrimidinones are also allosteric inhibitors with an unknown binding site on TG2.[9, 10] All inhibitors were dissolved to 10 mM in DMSO to a final volume of 60–100  $\mu$ L and stored at -20 °C until use. The DMSO stock solutions were diluted to 100  $\mu$ M in aqueous buffer for experiments. The table is a numbered list of compounds assayed inhibition for AgTG3, with internal compound code, SMILES string, chemical structure and reference. Footnotes refer to unpublished work of the following Khosla laboratory researchers: \* Kihang Choi, † Eun Cho, ‡ Cornelius Klöck, § Edward Watts.

## Supplementary References

1. Castelhana AL, Billedeau R, Pliura DH, Bonaventura BJ, Krantz A: **Synthesis, chemistry, and absolute configuration of novel transglutaminase inhibitors containing a 3-halo-4,5-dihydroisoxazole.** *Bioorganic Chemistry* 1988, **16**:335-340.
2. Hausch F, Halttunen T, Maki M, Khosla C: **Design, synthesis, and evaluation of gluten peptide analogs as selective inhibitors of human tissue transglutaminase.** *Chem Biol* 2003, **10**:225-231.
3. Choi K, Siegel M, Piper JL, Yuan L, Cho E, Strnad P, Omary B, Rich KM, Khosla C: **Chemistry and biology of dihydroisoxazole derivatives: selective inhibitors of human transglutaminase 2.** *Chem Biol* 2005, **12**:469-475.
4. Watts RE, Siegel M, Khosla C: **Structure-activity relationship analysis of the selective inhibition of transglutaminase 2 by dihydroisoxazoles.** *J Med Chem* 2006, **49**:7493-7501.
5. Dafik L, Albertelli M, Stamnaes J, Sollid LM, Khosla C: **Activation and inhibition of transglutaminase 2 in mice.** *PLoS One* 2012, **7**:e30642.
6. Diraimondo TR, Jin X, Klöck C, Khosla C: **Modulation of tissue transglutaminase activation in disease.** U.S. Patent Appl. WO2012177640 A3, Mar 14, 2013.
7. Diraimondo TR, Klöck C, Warburton R, Herrera Z, Penumatsa K, Toksoz D, Hill N, Khosla C, Fanburg B: **Elevated transglutaminase 2 activity is associated with hypoxia-induced experimental pulmonary hypertension in mice.** *ACS Chem Biol* 2014, **9**:266-275.
8. Klöck C, Jin X, Choi K, Khosla C, Madrid PB, Spencer A, Raimundo BC, Boardman P, Lanza G, Griffin JH: **Acylideneoxoindoles: a new class of reversible inhibitors of human transglutaminase 2.** *Bioorg Med Chem Lett* 2011, **21**:2692-2696.
9. Duval E, Case A, Stein RL, Cuny GD: **Structure-activity relationship study of novel tissue transglutaminase inhibitors.** *Bioorg Med Chem Lett* 2005, **15**:1885-1889.
10. Case A, Stein RL: **Kinetic analysis of the interaction of tissue transglutaminase with a nonpeptidic slow-binding inhibitor.** *Biochemistry* 2007, **46**:1106-1115.

| # | ID  | SMILES                                                                         | Structure                                           | Ref. |
|---|-----|--------------------------------------------------------------------------------|-----------------------------------------------------|------|
| 1 | D11 | <chem>C1C=NO[C@@H](C1)[C@@H](C(O)=O)NC(OCC2C(C=CC=C3)=C3C4=C2C=CC=C4)=O</chem> |                                                     | [2]  |
| 2 | D12 | <chem>BrC1=NOC(C1)CNC([C@H](CC2=CC=CC=C2)NC(OCC3=CC=CC=C3)=O)=O</chem>         |                                                     | [3]  |
| 3 | D13 | <chem>BrC1=NOC(C1)CNC(CC[C@@H](C(OC)=O)NC(OCC2=CC=CC=C2)=O)=O</chem>           |                                                     | *    |
| 4 | D14 | <chem>BrC1=NOC(C1)CNC(C[C@@H](C(OC)=O)NC(OCC2=CC=CC=C2)=O)=O</chem>            |                                                     | *    |
| 5 | D15 |                                                                                | Ac-PQPE(DHI)LPF-NH <sub>2</sub>                     | [2]  |
| 6 | D16 | <chem>BrC1=NOC(CNC([C@H](CC(OC(C)(C)C)=O)NC(OCC2=CC=CC=C2)=O)=O)C1</chem>      |                                                     | *    |
| 7 | D17 |                                                                                | Z-FD(DHI)LP-NH-CH <sub>2</sub> -CH <sub>2</sub> -Ph | *    |
| 8 | D21 | <chem>BrC1=NOC(CNC([C@H](C)NC(OCC2=CC=CC=C2)=O)=O)C1</chem>                    |                                                     | [3]  |
| 9 | D22 | <chem>BrC1=NOC(CNC([C@H](CC2=CC=CC=C2)NC(C)=O)=O)C1</chem>                     |                                                     | [3]  |

|    |            |                                                                                |  |     |
|----|------------|--------------------------------------------------------------------------------|--|-----|
| 10 | <b>D23</b> | <chem>BrC1=NOC(CNC([C@@H](CC2=CC=CC=C2)NC(OCC3=CC=CC=C3)=O)=O)C1</chem>        |  | [3] |
| 11 | <b>D24</b> | <chem>BrC1=NOC(CNC([C@H](CC(O)=O)NC(OC2=CC=CC=C2)=O)=O)C1</chem>               |  | *   |
| 12 | <b>D25</b> | <chem>BrC1=NOC(CNC([C@H](CC2=CC=CC=C2)NC(OCC3=CC=CC=C3)=O)=O)C1</chem>         |  | [3] |
| 13 | <b>D26</b> | <chem>BrC1=NO[C@@H](CNC([C@H](CC2=CC=C(O)C=C2)NC(OCC3=CC=CC=C3)=O)=O)C1</chem> |  | [4] |
| 14 | <b>D27</b> | <chem>BrC1=NO[C@H](CNC([C@H](CC2=CC=C(O)C=C2)NC(OCC3=CC=CC=C3)=O)=O)C1</chem>  |  | [4] |
| 15 | <b>D28</b> | <chem>BrC1=NOC(CNC(C(CC2=CNC3C2C=C(O)C=C3)NC(OCC4=CC=CC=C4)=O)=O)C1</chem>     |  | [3] |
| 16 | <b>D31</b> | <chem>BrC1=NOC(CNC([C@H](CC2=CC=C(F)C=C2)NC(OCC3=CC=CC=C3)=O)=O)C1</chem>      |  | [3] |

|    |            |                                                                                          |                                                                                      |     |
|----|------------|------------------------------------------------------------------------------------------|--------------------------------------------------------------------------------------|-----|
| 17 | <b>D32</b> | <chem>BrC1=NOC(CNC([C@H](CC2=CC=CC(F)=C2)NC(OCC3=CC=CC=C3)=O)=O)C1</chem>                | 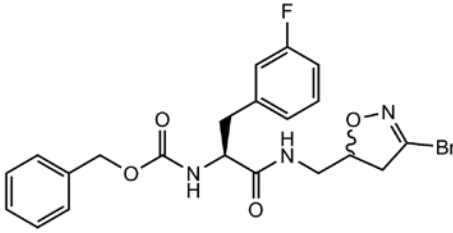   | [3] |
| 18 | <b>D33</b> | <chem>BrC1=NOC(CNC([C@H](CC2=CC=C(O)C=C2)NC(OCCN(C(C3=C4C=CC=C3)=O)S4(=O)=O)=O)C1</chem> |    | *   |
| 19 | <b>D34</b> | <chem>BrC1=NOC(CNC([C@H](CC2=CC=C(O)C=C2)NC(OCC3=CC4=C(C=CC=C4)S3)=O)=O)C1</chem>        |    | *   |
| 20 | <b>D41</b> | <chem>BrC1=NOC(CNC([C@H](CC2=CC=C(O)C=C2)NC(OCC3=CC=CN=C3)=O)=O)C1</chem>                |   | [3] |
| 21 | <b>D42</b> | <chem>BrC1=NOC(CNC([C@H](CC2=CC=C(O)C=C2)NC(OCC3=CC(C=CC=C4)=C4C=C3)=O)=O)C1</chem>      |  | [3] |
| 22 | <b>D43</b> | <chem>BrC1=NOC(CNC([C@H](CC2=CC=C(O)C=C2)NC(OCCC3=CC=CC=C3)=O)=O)C1</chem>               |  | [3] |
| 23 | <b>D45</b> | <chem>BrC1=NOC(CNC([C@H](CC2=CC=C(O)C=C2)NC(OCCS(C3=CC=CC=C3)(=O)=O)=O)C1</chem>         |  | †   |

24 **D51**
BrC1=NOC(CNC(C(CC2=CNC3C2C=C(F)C=C3)NC(OCC4=CC=CC=C4)=O)=O)C1
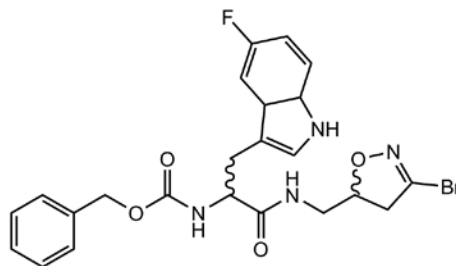

[4]

25 **D52**
BrC1=NOC(CNC(C(CC2=CNC3C2C(F)=CC=C3)NC(OCC4=CC=CC=C4)=O)=O)C1
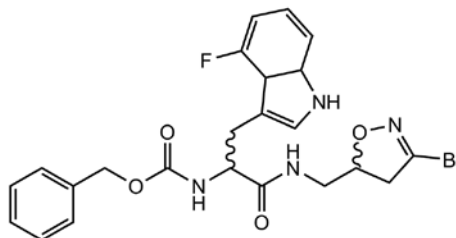

[4]

26 **D53**
BrC1=NOC(CNC(C(CC2=CNC3C2C=CC(F)=C3)NC(OCC4=CC=CC=C4)=O)=O)C1
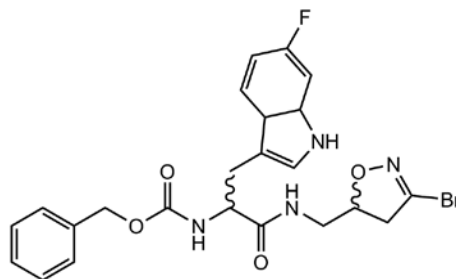

[4]

27 **D54**
BrC1=NOC(CNC(C(CC2=CNC3C2C=CC=N3)NC(OCC4=CC=CC=C4)=O)=O)C1
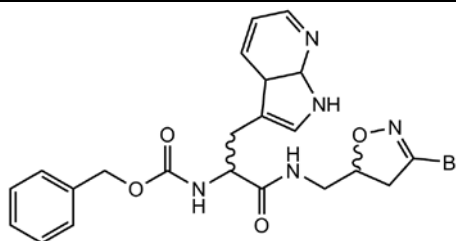

[4]

28 **D55**
BrC1=NO[C@H](CNC([C@H](CCC2)N2C(OCC3=CC(C=CC=C4)=C4N=C3)=O)=O)C1
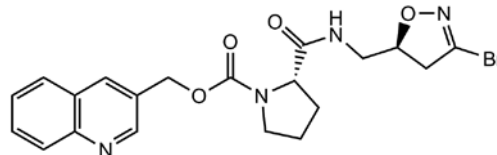

[4]

29 **D56**
BrC1=NO[C@H](CNC([C@H](CC2=CNC3C2C=C(F)C=C3)NC(OCC4=CC(C=CC=C5)=C5N=C4)=O)=O)C1
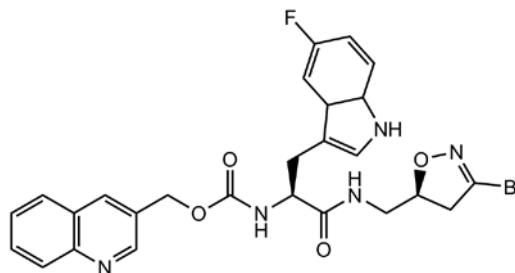

[4]

30 **D57** BrC1=NOC(CNC(C(CC2=CNC3C2C=C(F)C=C3)NC(OCC4CNC5=C(C=CC=C5)O4)=O)=O)C1

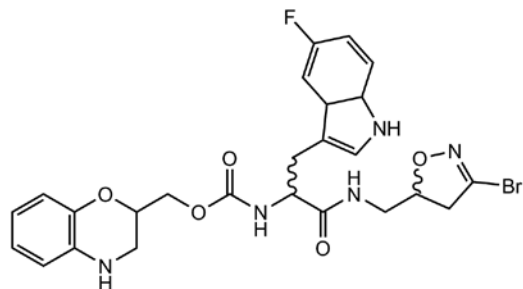

§

31 **D58** BrC1=NOC(CNC([C@H](CC2=CC=C(O)C=C2)NC(OCC3CNC4=C(C=CC=C4)O3)=O)=O)C1

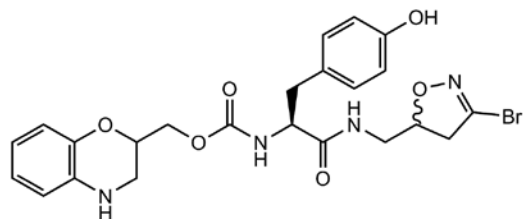

§

32 **D61** BrC1=NO[C@H](CNC([C@H](CC2=CC=C(O)C=C2)NC(OCC3=CC(C=CC=C4)=C4N=C3)=O)=O)C1

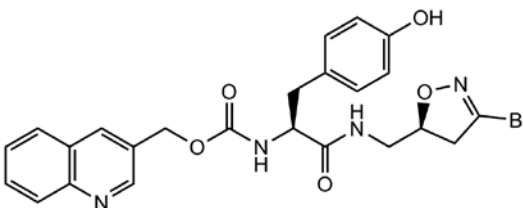

[4]

33 **D62** BrC1=NO[C@@H](CNC([C@H](CC2=CC=C(O)C=C2)NC(OCC3=CC(C=CC=C4)=C4N=C3)=O)=O)C1

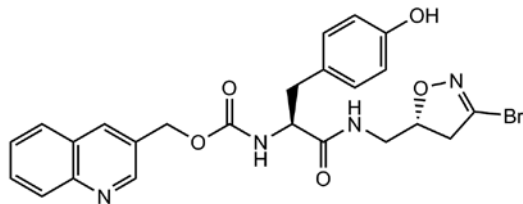

[4]

34 **D63** BrC1=NO[C@@H](CNC([C@H]2N(CCC2)C(OCC3=CC(C=CC=C4)=C4N=C3)=O)=O)C1

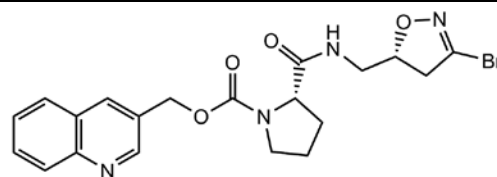

[4]

35 **D64** BrC1=NO[C@H](CNC([C@H]2N(CCC2)C(OCC3=CC(C=CC=C4)=C4N=C3Cl)=O)=O)C1

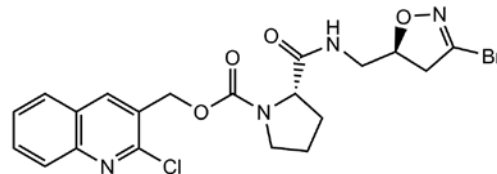

§

36 **D65** BrC1=NO[C@@H](CNC([C@H]2N(CCC2)C(OCC3=CC(C=CC=C4)=C4N=C3Cl)=O)=O)C1

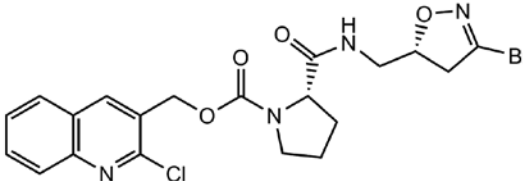

§

37 **D66**

BrC1=NO[C@@H](CNC([C@H](CC2=CNC3C2=C(F)C=C3)NC(OCC4=CC(C=CC=C5)=C5N=C4)=O)=O)C1

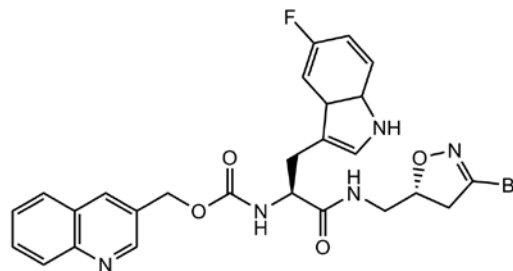

[4]

38 **D71**

BrC1=NO[C@@H](CNC([C@@H](NC(OCC2C3=C(C4=C2C=CC=C4)C=CC=C3)=O)CC5=CC=C(O)C=C5)=O)C1

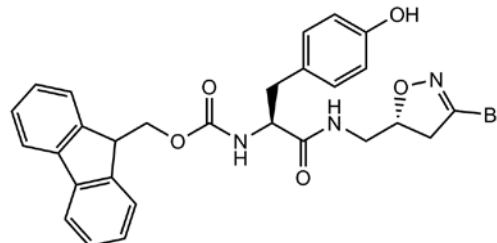

§

39 **D72**

O=C(N[C@H](C(N1[C@@H](CCC1)C(NC[C@H]2ON=C(Br)C2)=O)=O)CCC(N)=O)OCC3=CC=CC=C3

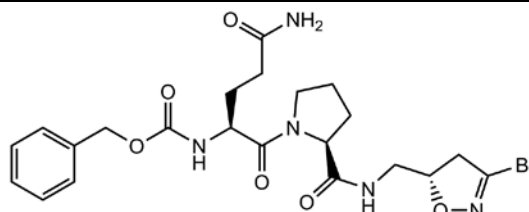

§

40 **D73**

BrC1=NO[C@H](CNC([C@@H](NC(OCC2C3=C(C4=C2C=CC=C4)C=CC=C3)=O)CC5=CC=C(O)C=C5)=O)C1

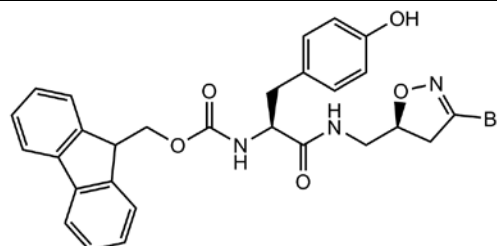

§

41 **D81**

BrC1=NO[C@H](CNC([C@@H](CC2=CC=CC=C2)NC(OCC3=CC(C=CC=C4)=C4N=C3)=O)=O)C1

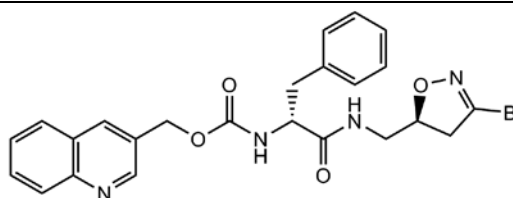

This work

42 **D82**

BrC1=NO[C@H](CNC([C@H](CC2=CC=C(I)C=C2)NC(OCC3=CC(C=CC=C4)=C4N=C3)=O)=O)C1

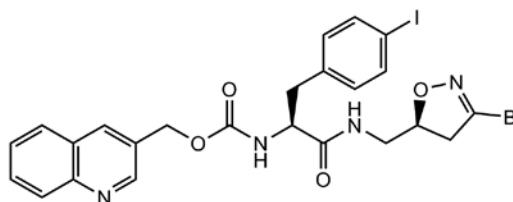

This work

43 **D83**

BrC1=NO[C@H](CNC([C@H](CC2=CC=CC=C2)N(C)C(OCC3=CC(C=CC=C4)=C4N=C3)=O)=O)C1

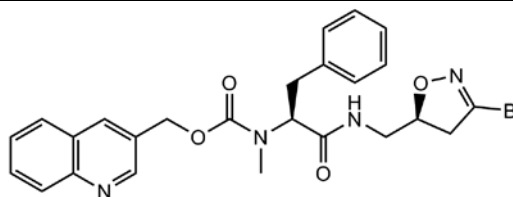

‡

44 **D84** BrC1=NO[C@H](CNC([C@H](CC2=CC=C(C3=CC=CC=C3)C=C2)NC(OCC4=CC(C=C=C5)=C5N=C4)=O)=O)C1

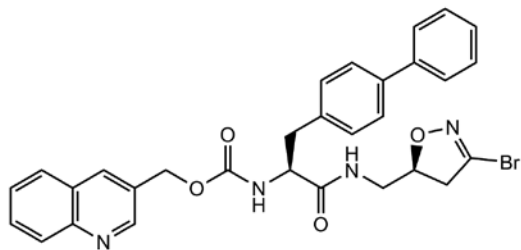

45 **D85** BrC1=NO[C@H](CNC([C@H](CCC2=CC=C(C=C2)NC(OCC3=CC(C=CC=C4)=C4N=C3)=O)=O)C1

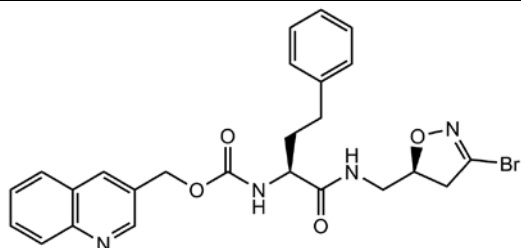

46 **D86** BrC1=NO[C@H](CNC([C@H](CC2=CC=CC3=C2C=CC=C3)NC(OCC4=CC(C=CC=C5)=C5N=C4)=O)=O)C1

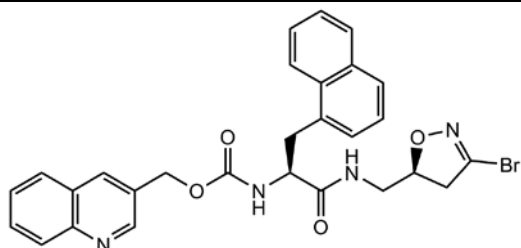

47 **D87** BrC1=NO[C@H](CNC([C@H](CC2=CC=C(O)C=C2)NC(OCC3=CC(C=CC=C4)=C4N=C3)=O)=O)C1

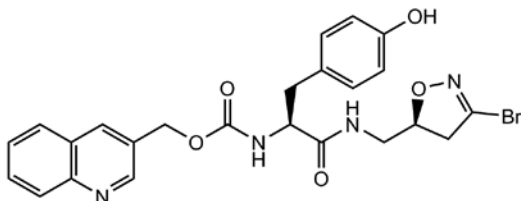

48 **D88** BrC1=NO[C@H](CNC([C@H](CC2=CC=CC=C2)NC(OCC3=CC(C=CC=C4)=C4N=C3)=O)=O)C1

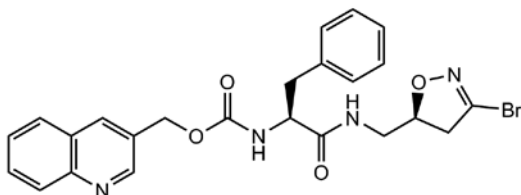

49 **D91** BrC1=NO[C@H](CNC([C@@](CC2=CC=C(C=C2)(C)NC(OCC3=CC(C=CC=C4)=C4N=C3)=O)=O)C1

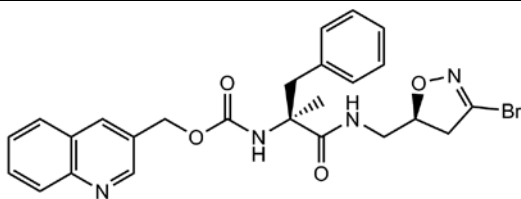

50 **D92** O=C(N1CC2=C(C=CC=C2)C[C@H]1C(NC[C@@H]3CC(Br)=NO3)=O)OCC4=CC(C=C=C5)=C5N=C4

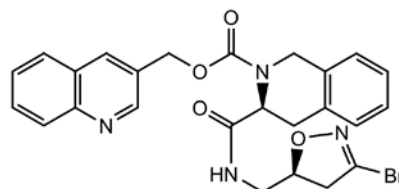



|    |             |                                                                                                   |  |           |
|----|-------------|---------------------------------------------------------------------------------------------------|--|-----------|
| 51 | <b>D93</b>  | <chem>BrC1=NO[C@H](CNC([C@H](CC2=CSC3C2=CC=C3)NC(OCC4=CC(C=CC=C5)=C5N=C4)=O)=O)C1</chem>          |  | This work |
| 52 | <b>D94</b>  | <chem>BrC1=NO[C@H](CNC([C@@]([C@@H](C)C2=CC=CC=C2)([H])NC(OCC3=CC(C=CC=C4)=C4N=C3)=O)=O)C1</chem> |  | ‡         |
| 53 | <b>D95</b>  | <chem>BrC1=NO[C@H](CNC([C@H](CC2=C(F)C=CC=C2)NC(OCC3=CC(C=CC=C4)=C4N=C3)=O)=O)C1</chem>           |  | This work |
| 54 | <b>D96</b>  | <chem>BrC1=NO[C@H](CNC([C@H](CC2=CC=C(F)C=C2)NC(OCC3=CC(C=CC=C4)=C4N=C3)=O)=O)C1</chem>           |  | This work |
| 55 | <b>D97</b>  | <chem>O=C(NC[C@H]1ON=C(C1)Br)[C@@H]2CC(C=CC=C3)=C3CN2C(OCC4=CC=C(C#C)C=C4)=O</chem>               |  | ‡         |
| 56 | <b>D98</b>  | <chem>O=C(N1CC2=C(C(C=CC=C3)=C3N2)C[C@H]1C(NC[C@@H]4CC(Br)=NO4)=O)OCC5=CC(C=CC=C6)=C6N=C5</chem>  |  | [6], ‡    |
| 57 | <b>D101</b> | <chem>BrC1=NO[C@H](CNC([C@H]2N(CCC2)C(O)C(C)(C)C)=O)=O)C1</chem>                                  |  | ‡         |
| 58 | <b>D102</b> | <chem>BrC1=NO[C@H](CNC([C@@H]2N(CCC2)C(OC(C)(C)C)=O)=O)C1</chem>                                  |  | ‡         |

|    |             |                                                                                                  |  |           |
|----|-------------|--------------------------------------------------------------------------------------------------|--|-----------|
| 59 | <b>D103</b> | <chem>BrC1=NO[C@H](CNC([C@H](CC2=CNC3C2C=C(F)C=C3)NC(OC(C)(C)C)=O)=O)C1</chem>                   |  | This work |
| 60 | <b>D104</b> | <chem>BrC1=NO[C@H](CNC([C@H]2N(CCC2)C(OCC3=NC(C=CC=C4)=C4N=C3)=O)=O)C1</chem>                    |  | ‡         |
| 61 | <b>D105</b> | <chem>BrC1=NO[C@H](CNC([C@H](CC2=CNC3C2C=C(F)C=C3)NC(OCC4=NC(C=CC=C5)=C5N=C4)=O)=O)C1</chem>     |  | This work |
| 62 | <b>D106</b> | <chem>BrC1=NO[C@H](CNC([C@H]2N(CCC2)C(OCC3=C(C=CC=C4)C4=NC=C3)=O)=O)C1</chem>                    |  | ‡         |
| 63 | <b>D107</b> | <chem>BrC1=NO[C@H](CNC([C@H](CC2=CNC3C2C=C(F)C=C3)NC(OCC4=C(C=CC=C5)C5=NC=C4)=O)=O)C1</chem>     |  | This work |
| 64 | <b>D108</b> | <chem>O=C(N1CC2=C(C(C=CC=C3)=C3N2)C[C@H]1C(NC[C@@H]4CC(Br)=NO4)=O)OCC5=NC(C=CC=C6)=C6N=C5</chem> |  | ‡         |
| 65 | <b>D111</b> | <chem>BrC1=NO[C@H](CNC([C@H]2N(CCC2)C(C3=NC=CN=C3)=O)=O)C1</chem>                                |  | ‡         |
| 66 | <b>D112</b> | <chem>BrC1=NO[C@H](CNC([C@H]2N(CCC2)C(C3=NC(C=CC=C4)=C4N=C3)=O)=O)C1</chem>                      |  | ‡         |

|    |             |                                                                                                   |  |        |
|----|-------------|---------------------------------------------------------------------------------------------------|--|--------|
| 67 | <b>D113</b> | <chem>BrC1=NO[C@H](CNC([C@H]2N(CCC2)C(OCC3=CC=C(C#C)C=C3)=O)=O)C1</chem>                          |  | [5]    |
| 68 | <b>D114</b> | <chem>ClC1=NO[C@H](CNC([C@H]2N(CC[C@@H]2O)C(OCC3=CC(C=CC=C4)=C4N=C3)=O)=O)C1</chem>               |  | ‡      |
| 69 | <b>D115</b> | <chem>ClC1=NO[C@H](CNC([C@H]2N(C[C@H](O)C2)C(OCC3=CC(C=CC=C4)=C4N=C3)=O)=O)C1</chem>              |  | ‡      |
| 70 | <b>D116</b> | <chem>ClC1=NO[C@H](CNC([C@H]2N(C[C@@H](O)C2)C(OCC3=CC(C=CC=C4)=C4N=C3)=O)=O)C1</chem>             |  | ‡      |
| 71 | <b>D117</b> | <chem>ClC1=NO[C@H](CNC([C@H]2N(CC[C@H]2O)C(OCC3=CC(C=CC=C4)=C4N=C3)=O)=O)C1</chem>                |  | ‡      |
| 72 | <b>D121</b> | <chem>ClC1=NO[C@H](CNC([C@H]2N(CC2)C(OCC3=CC(C=CC=C4)=C4N=C3)=O)=O)C1</chem>                      |  | ‡      |
| 73 | <b>D131</b> | <chem>BrC1=NO[C@H](CNC([C@H]2N(C[C@H](O)CC3=CC=CC=C3)C2)C(OCC4=CC(C=CC=C5)=C5N=C4)=O)=O)C1</chem> |  | [6, 7] |
| 74 | <b>D132</b> | <chem>BrC1=NO[C@H](CNC([C@H](CC2=CNC3C2C=CC=C3)NC(OCC4=CC(C=CC=C5)=C5N=C4)=O)=O)C1</chem>         |  | [5]    |
| 75 | <b>D133</b> | <chem>O=C(N1CCCC[C@H]1C(NC[C@@H]2CC(Br)=NO2)=O)OCC3=CC(C=CC=C4)=C4N=C3</chem>                     |  | [6], ‡ |

|    |             |                                                                                              |  |        |
|----|-------------|----------------------------------------------------------------------------------------------|--|--------|
| 76 | <b>D134</b> | <chem>BrC1=NO[C@H](CNC([C@H]2N(C[C@H](O)C2)C(OCC3=CC(C=CC=C4)=C4N=C3)=O)=O)C1</chem>         |  | [6], ‡ |
| 77 | <b>D135</b> | <chem>BrC1=NO[C@H](CNC([C@H]2N(C[C@H](O)C)C2)C(OCC3=CC(C=CC=C4)=C4N=C3)=O)=O)C1</chem>       |  | [6], ‡ |
| 78 | <b>D136</b> | <chem>BrC1=NO[C@H](CNC([C@H]2N(C[C@H](O)CC#C)C2)C(OCC3=CC(C=CC=C4)=C4N=C3)=O)=O)C1</chem>    |  | [6, 7] |
| 79 | <b>D137</b> | <chem>BrC1=NO[C@H](CNC([C@H]2N(C[C@@H](F)C2)C(OCC3=CC(C=CC=C4)=C4N=C3)=O)=O)C1</chem>        |  | [6, 7] |
| 80 | <b>D138</b> | <chem>BrC1=NO[C@H](CNC([C@H]2N(C[C@H](F)C2)C(OCC3=CC(C=CC=C4)=C4N=C3)=O)=O)C1</chem>         |  | [6, 7] |
| 81 | <b>D141</b> | <chem>BrC1=NO[C@H](CNC([C@H](CC2=CNC3C2C=C(O)C=C3)NC(OCC4=CC(C=CC=C5)=C5N=C4)=O)=O)C1</chem> |  | [5]    |
| 82 | <b>D142</b> | <chem>BrC1=NO[C@H](CNC([C@H](CC2=CC=C(O)C=C2)NC(OCC3=CC=C(C#C)C=C3)=O)=O)C1</chem>           |  | [5]    |
| 83 | <b>D143</b> | <chem>BrC1=NO[C@H](CNC([C@H](CC2=CC=C(O)C=C2)NC(OCC3=CC=C(N=[N+]=[N-])C=C3)=O)=O)C1</chem>   |  | [5]    |

84 I11 O=C1NC2=CC(F)=CC=C2/C1=C\C(C)=O

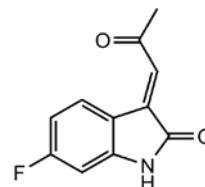

[8]

85 I12 O=C1NC2=CC=CC(Cl)=C2/C1=C\C(C)=O

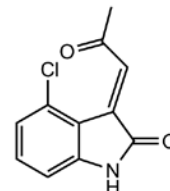

[8]

86 I13 O=C1NC2=CC=CC(Cl)=C2/C1=C\C(C3=CN=CC=C3)=O

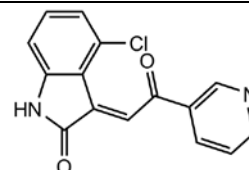

[8]

87 I14 O=C1NC2=CC=C(Cl)C=C2/C1=C\C(C3=CN=CC=C3)=O

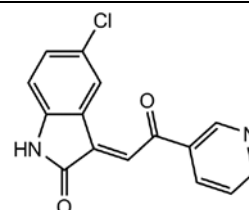

[8]

88 I15 O=C1NC2=CC(Cl)=CC=C2/C1=C\C(C3=CN=CC=C3)=O

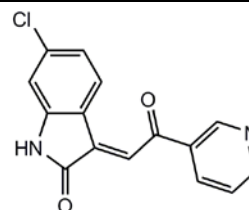

[8]

89 I16 O=C1NC2=C(Cl)C=CC=C2/C1=C\C(C3=CN=CC=C3)=O

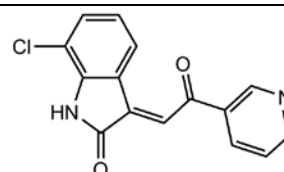

[8]

90 I17 O=C1N(CC2=CC=CC=C2)C3=CC=CC(Cl)=C3/C1=C\C(C4=CN=CC=C4)=O

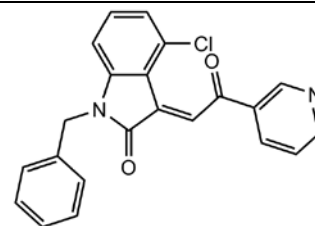

[8]

91 I18 O=C1NC2=CC=CC(Cl)=C2/C1=C\C(C3=CC=C(Cl)C=C3)=O

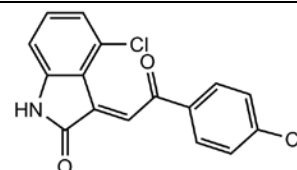

[8]

92 M11

O=C1N(C2=CC=CC=C2)C(SCC(NN)=O)=N  
C3=C1C(C4=CC=CC=C4)=CS3

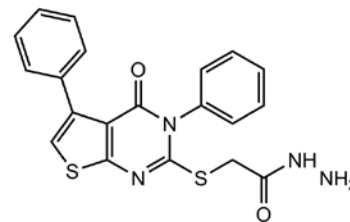

[9]
