# Supplementary material for: Dihydroisoxazole inhibitors of Anopheles gambiae seminal transglutaminase AgTG3
Source: PubMed Central journal article supplement (PMC4113009; doi:10.1186/1475-2875-13-210), 2014-06-02
Supplement: 1475-2875-13-210-S3.pdf [file 1475-2875-13-210-S3.pdf]

Supplementary Table 2. AgTG3 IC<sub>50</sub> for 27 dihydroisoxazole inhibitors

|            | Structure | IC <sub>50</sub> | Structure | IC <sub>50</sub> |
|------------|-----------|------------------|-----------|------------------|
| D56        |           | 3.1              | D66       | >100             |
| D61<br>D87 |           | 65               | D62       | >100             |
| D27        |           | >100             | D26       | >100             |
| D73        |           | >100             | D71       | >100             |
| D88        |           | 29               | D81       | >100             |
| D82        |           | >100             | D83       | >100             |
| D84        |           | >100             | D85       | >100             |
| D86        |           | >100             | D91       | >100             |
| D93        |           | 18               | D94       | 84               |
| D95        |           | 28               | D96       | 66               |

|      | Structure                                                                         | IC <sub>50</sub> |      | Structure                                                                           | IC <sub>50</sub> |
|------|-----------------------------------------------------------------------------------|------------------|------|-------------------------------------------------------------------------------------|------------------|
| D105 | 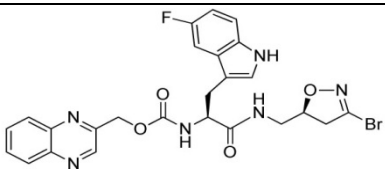 | 9.7              | D103 |  | 56               |
| D132 |  | 6.1              | D107 |  | 12.2             |
| D141 |  | 4.3              |      |                                                                                     |                  |
| D142 |  | >100             | D143 |  | >100             |
