# Supplementary material for: Dihydroisoxazole inhibitors of Anopheles gambiae seminal transglutaminase AgTG3
Source: PubMed Central journal article supplement (PMC4113009; doi:10.1186/1475-2875-13-210), 2014-06-02

**Supplementary Table 3. Graphical comparison of AgTG3 IC<sub>50</sub> for 27 dihydroisoxazole inhibitors**

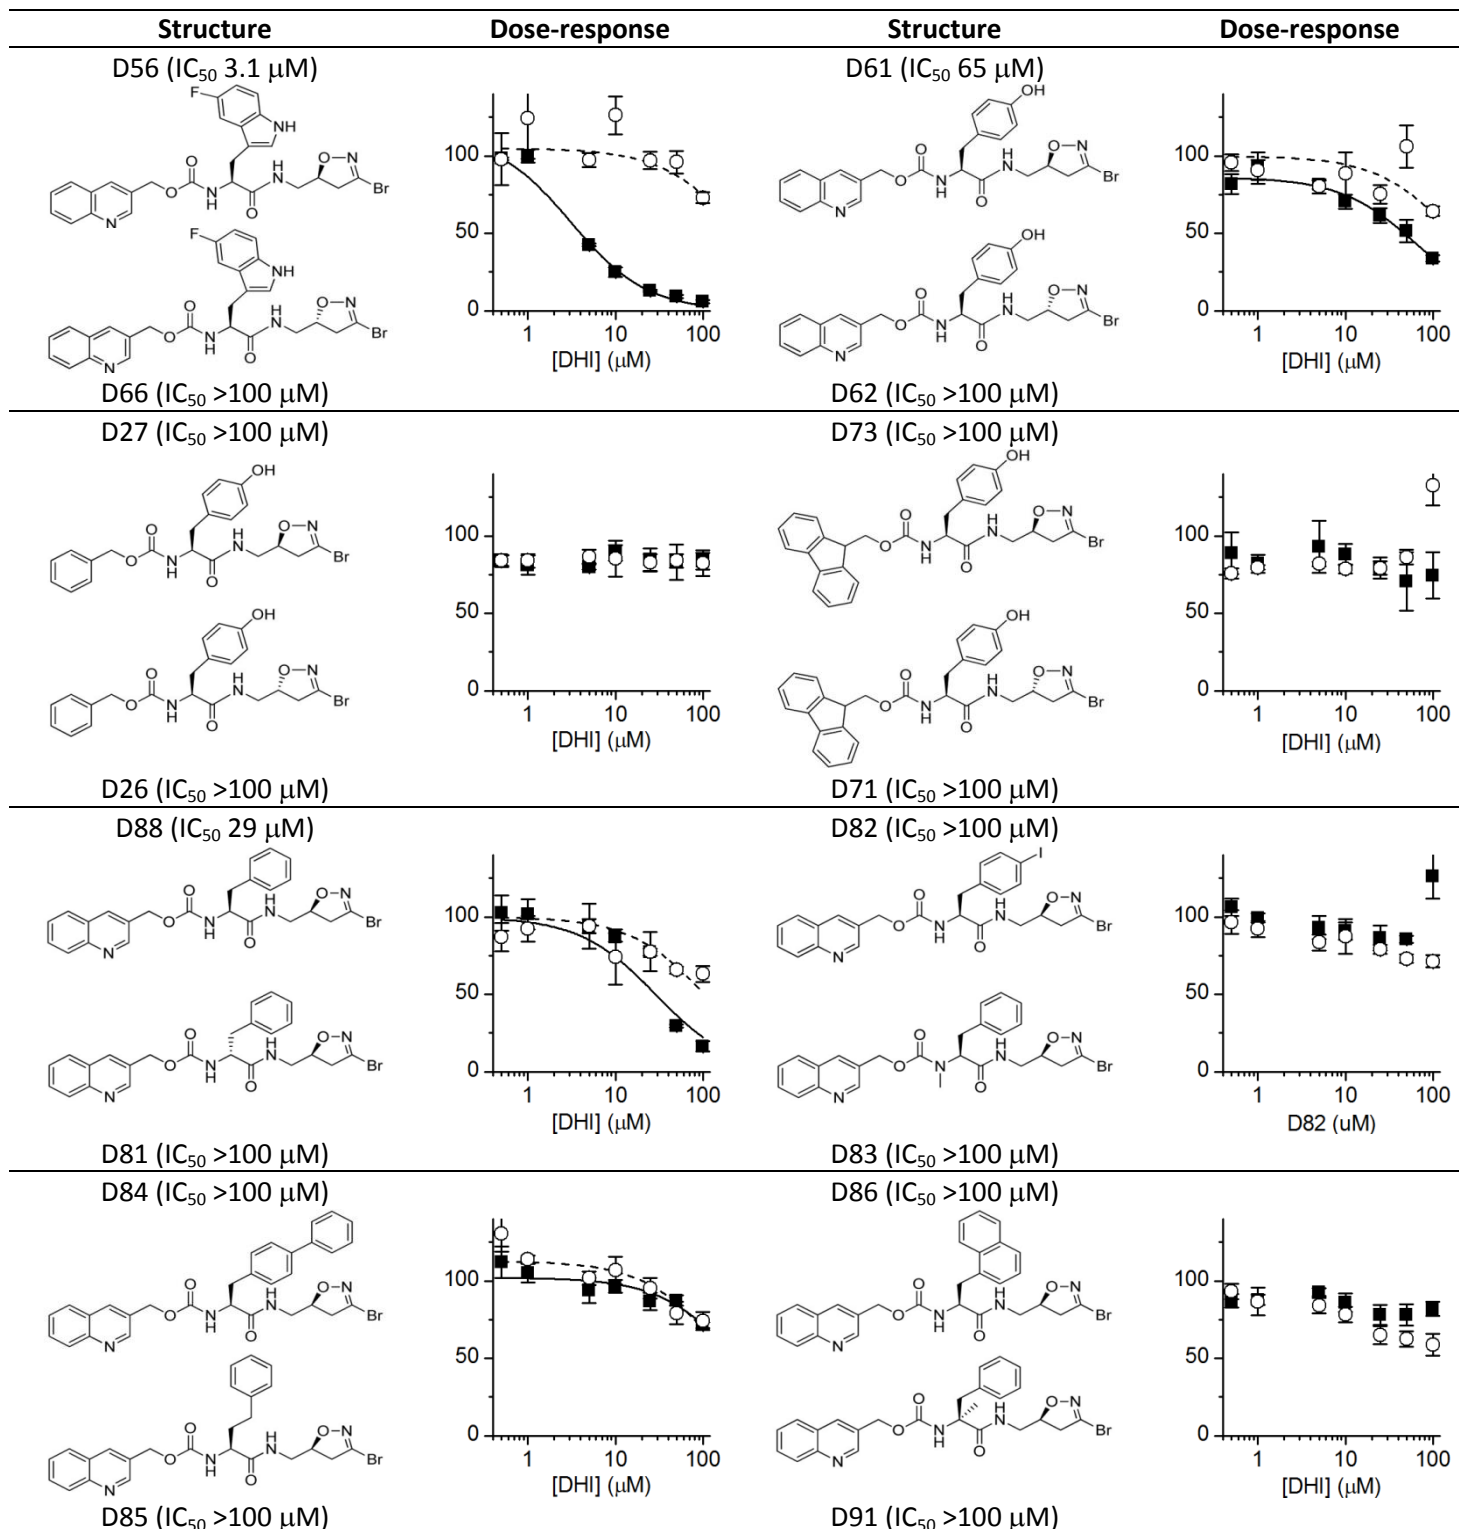

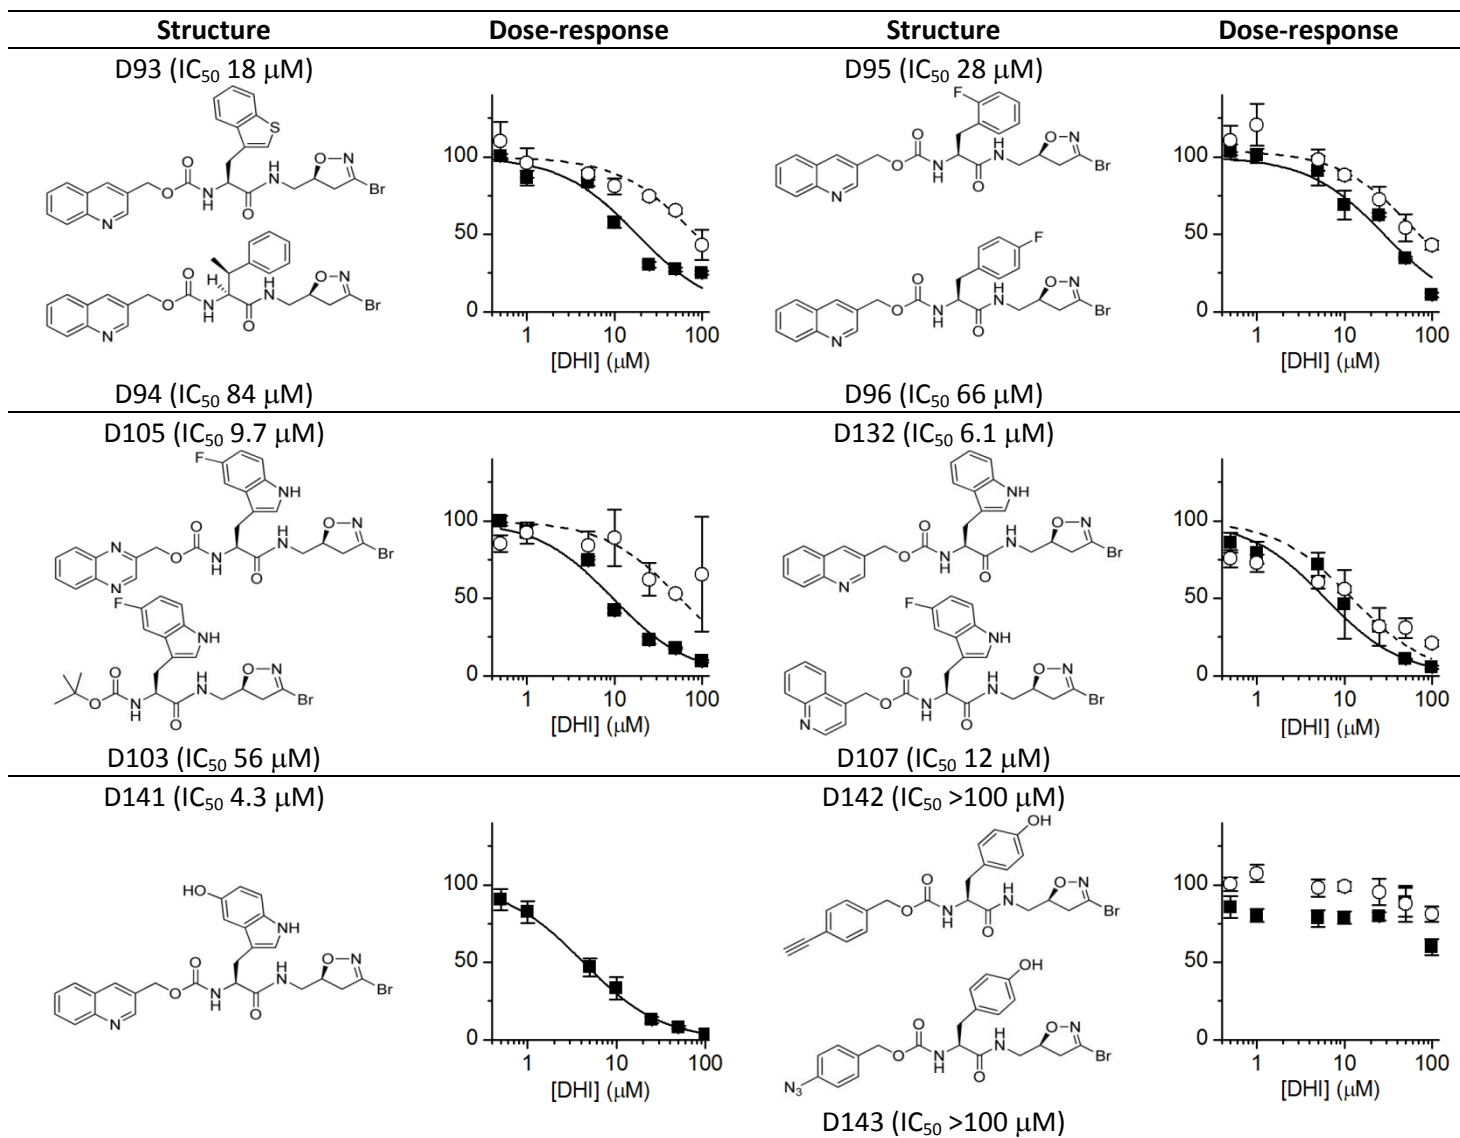

Supplement: 1475-2875-13-210-S4.pdf [file 1475-2875-13-210-S4.pdf]
